# Supplementary material for: Accelerating active catalyst discovery: a probabilistic prediction-based screening methodology with applications in dry reforming of methane
Source: Royal Society of Chemistry journal article supplement (doi:10.1039/d3ta05472a), 2023-12-14
Supplement: d3ta05472a1.pdf [file d3ta05472a1.pdf]

1

## Supplementary Information

2

### 3 **Accelerating Active Catalyst Discovery: A Probabilistic Prediction-Based Screening** 4 **Methodology with Applications in Dry Reforming of Methane**

5

6 Hyundo Park <sup>a,b,1</sup>, Jiwon Roh <sup>a,b,1</sup>, Hyungtae Cho <sup>a</sup>, Insoo Ro <sup>c,\*</sup>, Junghwan Kim <sup>b,\*</sup>

7 <sup>a</sup> Green Materials and Processes R&D Group, Korea Institute of Industrial Technology, 55 Jongga-ro,  
8 Ulsan 44413, Republic of Korea

9 <sup>b</sup> Department of Chemical and Biomolecular Engineering, Yonsei University, 50 Yonsei-ro, Seoul  
10 03722, Republic of Korea

11 <sup>c</sup> Department of Chemical and Biomolecular Engineering, Seoul National University of Science and  
12 Technology, 232 Gongneung-ro, Seoul 01811, Republic of Korea

13 <sup>1</sup> These authors contributed equally to this work.

14 \* Corresponding authors: [Insoo@seoultech.ac.kr](mailto:Insoo@seoultech.ac.kr) (I. Ro) and [kjh24@yonsei.ac.kr](mailto:kjh24@yonsei.ac.kr) (J. Kim)

15

16 **1. Experimental setup for DRM reaction**

17 In order to investigate the DRM reaction, an experimental setup for DRM reaction was constructed  
18 as shown in Figure S1. The experimental setup consists of three main parts: feed, reaction, and analysis  
19 part. The feed part consisted of Ar, CO<sub>2</sub>, CH<sub>4</sub>, H<sub>2</sub>, and N<sub>2</sub> gas cylinders, and mass flow controllers  
20 (MFC) for both reactant gases. The main obligation of the feed part is to supply the components of  
21 interest including Ar, CO<sub>2</sub>, CH<sub>4</sub>, H<sub>2</sub>, and N<sub>2</sub> to the reaction part, where a quartz-tube fixed bed reactor  
22 was mounted vertically inside a furnace.

23

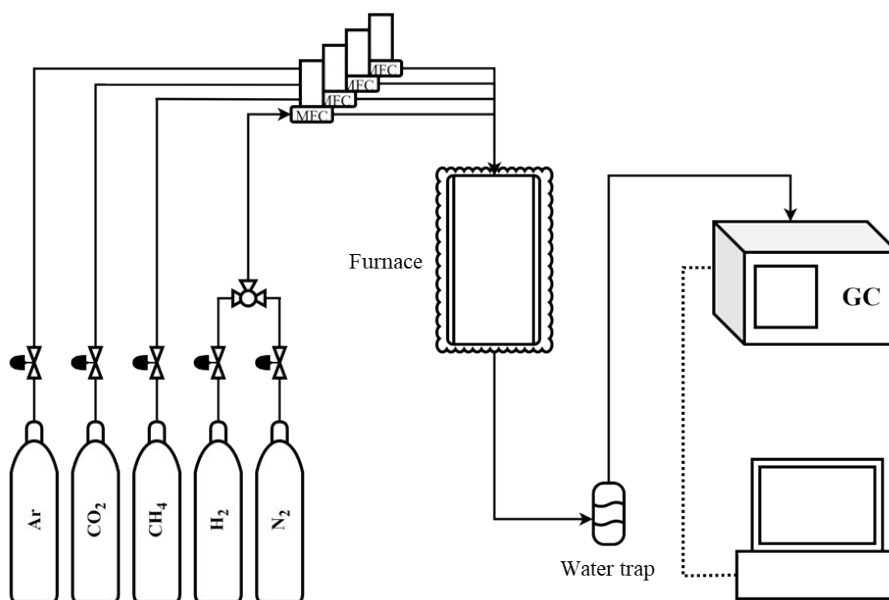

24

25 Fig. S1. Schematic of the experimental setup used for dry reforming of methane.

26

27 **2. Probabilistic prediction model validation**

28 We conducted N-fold cross-validation to validate the model. The cross-validation was performed  
29 for both 5 and 10 folds. Fig S2 shows the results of cross-validation using 5 and 10 folds.

30

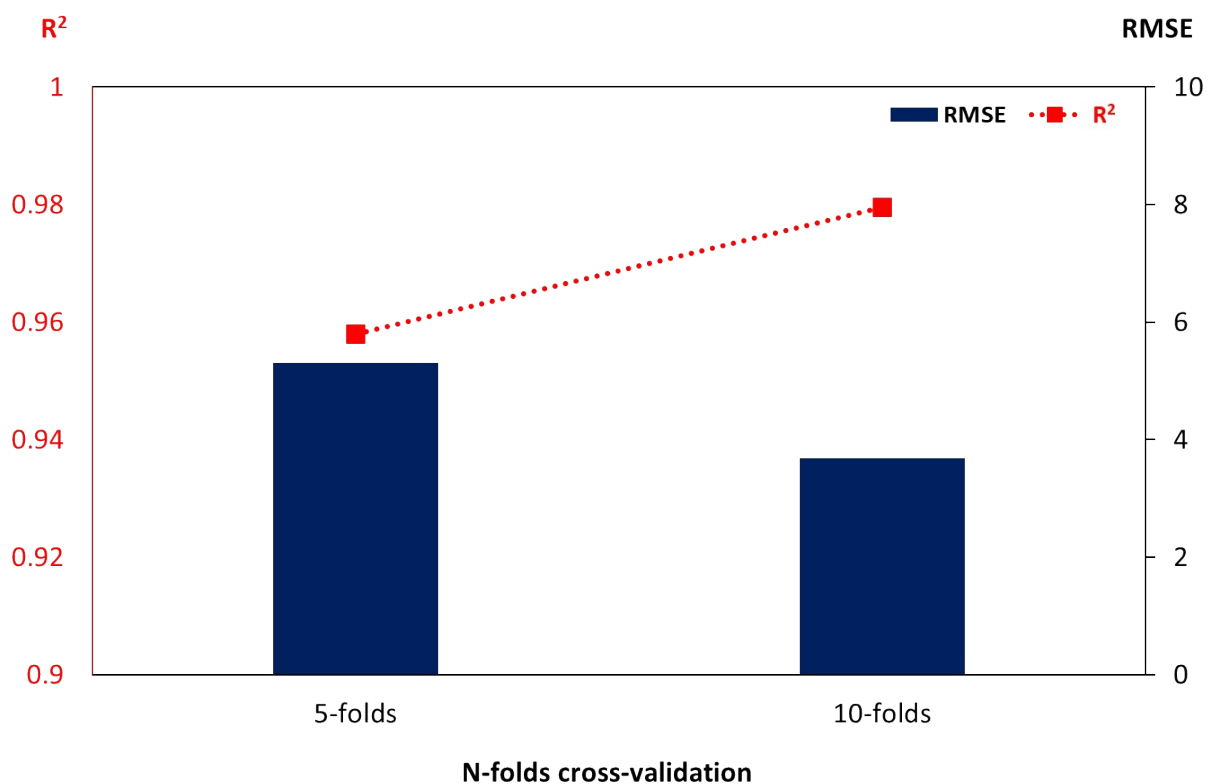

31

32 **Fig. S2. The results of N-folds cross-validation using 5-folds and 10-folds.**

33

34 **3. Feature importance results**

35

36 **Table S1. Feature importance value**

| Domain                             | Component        | Value  |
|------------------------------------|------------------|--------|
|                                    | Ni               | 0.1168 |
|                                    | Co               | 0.0623 |
|                                    | Pt               | 0.0373 |
|                                    | Pd               | 0.0197 |
|                                    | La               | 0.0190 |
|                                    | K                | 0.0158 |
|                                    | Rh               | 0.0121 |
|                                    | Ce               | 0.0105 |
|                                    | Cu               | 0.0101 |
| Design variables<br>(Active metal) | Zr               | 0.0101 |
|                                    | Mg               | 0.0086 |
|                                    | Ru               | 0.0080 |
|                                    | Y                | 0.0060 |
|                                    | Ir               | 0.0047 |
|                                    | Fe               | 0.0047 |
|                                    | Ca               | 0.0036 |
|                                    | Li               | 0.0021 |
|                                    | BN               | 0.0016 |
|                                    | Mn               | 0.0011 |
|                                    | Sr               | 0.0008 |
| Design variables                   | ZrO <sub>2</sub> | 0.0453 |
| (Support)                          | CeO <sub>2</sub> | 0.0170 |

|                        |                                                   |        |
|------------------------|---------------------------------------------------|--------|
|                        | Y <sub>2</sub> O <sub>3</sub>                     | 0.0153 |
|                        | Al <sub>2</sub> O <sub>3</sub> _gamma             | 0.0149 |
|                        | CaO                                               | 0.0129 |
|                        | ZrO <sub>2</sub> _nanocrystalline                 | 0.0129 |
|                        | MgO_nanocrystalline                               | 0.0115 |
|                        | SiO <sub>2</sub>                                  | 0.0111 |
|                        | MgO                                               | 0.0101 |
|                        | ZSM_5                                             | 0.0097 |
|                        | MnO                                               | 0.0082 |
|                        | TiO <sub>2</sub>                                  | 0.0069 |
|                        | La <sub>2</sub> O <sub>3</sub>                    | 0.0060 |
|                        | PrO <sub>2</sub>                                  | 0.0045 |
|                        | SBA_15                                            | 0.0044 |
|                        | Al <sub>2</sub> O <sub>3</sub> _alpha             | 0.0037 |
|                        | MgAl <sub>2</sub> O <sub>4</sub> _nanocrystalline | 0.0022 |
|                        | Al <sub>2</sub> O <sub>3</sub> _mesoporous        | 0.0021 |
|                        | MgAlO <sub>x</sub>                                | 0.0005 |
|                        | Si <sub>3</sub> N <sub>4</sub>                    | 0.0003 |
|                        | MCM_41                                            | 0.0002 |
|                        | V <sub>2</sub> O <sub>5</sub>                     | 0.0001 |
|                        | Calcination_Temperature                           | 0.0507 |
|                        | Reduction_Temperature                             | 0.0274 |
| Pretreatment variables | Preparation                                       | 0.0189 |
|                        | Calcination_time                                  | 0.0183 |
|                        | Reduction_time                                    | 0.0155 |
|                        | Reduction_H <sub>2</sub>                          | 0.0148 |
| Operating variables    | Reaction_Temperature                              | 0.0855 |

---

|                          |        |
|--------------------------|--------|
| GHSV                     | 0.0621 |
| Time_on_stream           | 0.0538 |
| Reaction_CO <sub>2</sub> | 0.0453 |
| Reaction_CH <sub>4</sub> | 0.0278 |
| Reaction_Ar              | 0.0114 |
| Reaction_He              | 0.0082 |
| Reaction_N <sub>2</sub>  | 0.0058 |

---

37

38

39 **4. The analysis of experimental validation results**

40 Among the 3958 training data points, the distribution based on the active metal is as follows: Ni:  
41 3044, Co: 553, Pt: 513, Rh: 130, Ru: 128, Pd: 52, Ir: 25, Ar: 21, Mn: 20, and Cu: 2. And the distribution  
42 based on the -ZrO<sub>2</sub> support is as follows: ZrO<sub>2</sub>: 303, CaO-ZrO<sub>2</sub>: 75, Y<sub>2</sub>O<sub>3</sub>-ZrO<sub>2</sub>: 73, SiO<sub>2</sub>-ZrO<sub>2</sub>: 70,  
43 CeO<sub>2</sub>-ZrO<sub>2</sub>: 46, MgO-ZrO<sub>2</sub>: 39, Al<sub>2</sub>O<sub>3</sub>-ZrO<sub>2</sub>: 7, La<sub>2</sub>O<sub>3</sub>-ZrO<sub>2</sub>: 2.

44

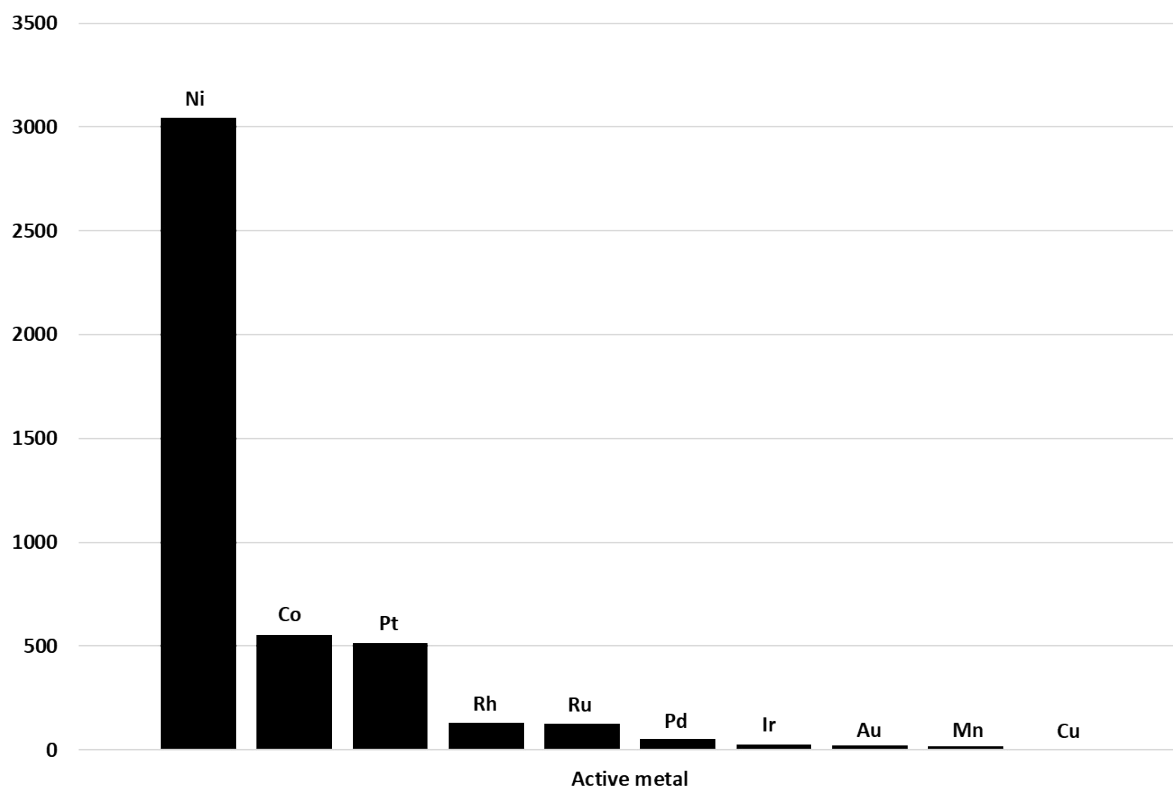

45

46 Fig. S3. Number of active metals in training data.

47

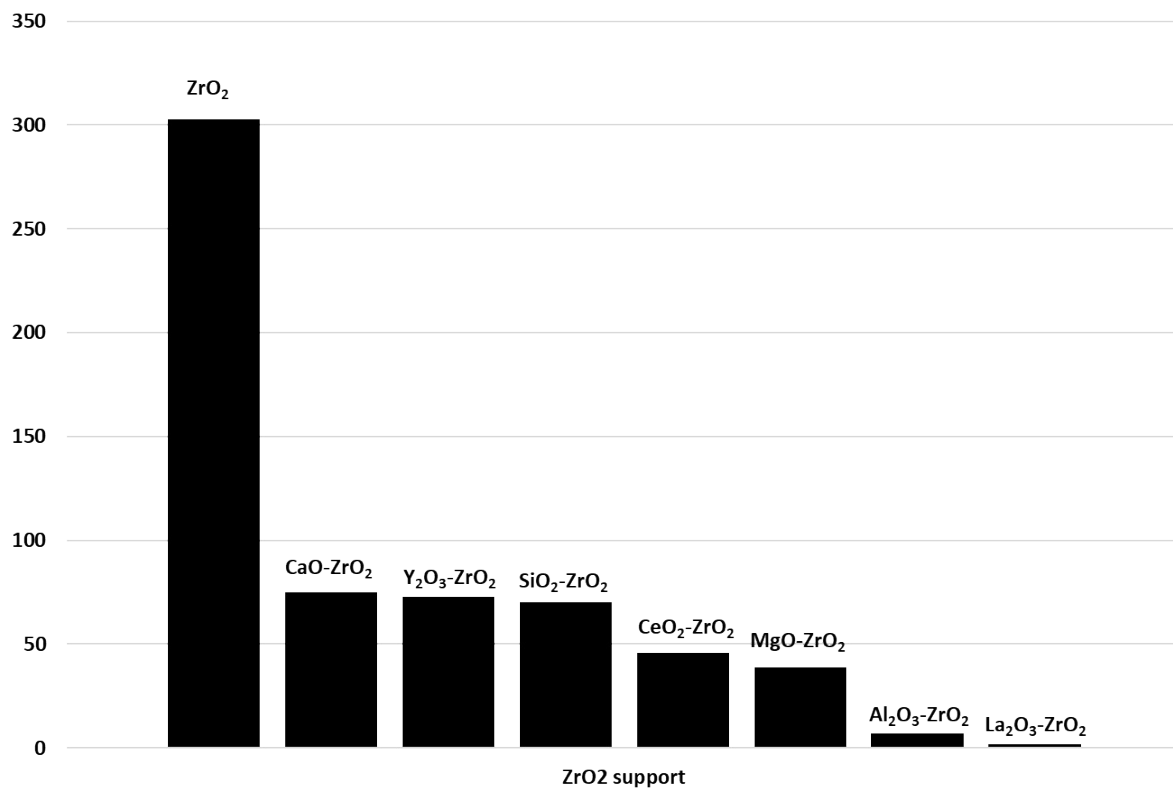

48

49 Fig. S4. Number of -ZrO<sub>2</sub> supported catalysts in training data.

50
